# Supplementary material for: A systems-based analysis to explore the multiple mechanisms of Shan Zha for treating human diseases
Source: Royal Society of Chemistry journal article supplement (doi:10.1039/d0fo02433c), 2020-12-16
Supplement: d0fo02433c1.xlsx [file d0fo02433c1.xlsx]

## Sheet: Sheet1
No.	Compound Name	Target	Gene Name	Realted Disease
M002	(−)-epicatechin gallate	Multidrug resistance protein 1	ABCB1	Cancer
M002	(−)-epicatechin gallate	Multidrug resistance protein 1	ABCB1	Infectious diseases
M083	kaempferol	Multidrug resistance protein 1	ABCB1	Cancer
M045	chlorogenic acid	Multidrug resistance protein 1	ABCB1	Cancer
M083	kaempferol	Multidrug resistance protein 1	ABCB1	Infectious diseases
M045	chlorogenic acid	Multidrug resistance protein 1	ABCB1	Infectious diseases
M083	kaempferol	Multidrug resistance-associated protein 1	ABCC1	Inflammation
M118	vanillic acid	ATP-binding cassette sub-family G member 2	ABCG2	Inflammation
M031	8-Methoxykaempferol 3-neohesperidoside	ATP-binding cassette sub-family G member 2	ABCG2	Inflammation
M083	kaempferol	ATP-binding cassette sub-family G member 2	ABCG2	Inflammation
M105	quercetin	ATP-binding cassette sub-family G member 2	ABCG2	Inflammation
M001	(-)-epicatechin	ATP-binding cassette sub-family G member 2	ABCG2	Inflammation
M107	rutin	Acetylcholinesterase	ACHE	Digestive system disease
M107	rutin	Acetylcholinesterase	ACHE	Inflammation
M107	rutin	Acetylcholinesterase	ACHE	Cancer
M107	rutin	Acetylcholinesterase	ACHE	Infectious diseases
M083	kaempferol	Acetylcholinesterase	ACHE	Digestive system disease
M083	kaempferol	Acetylcholinesterase	ACHE	Inflammation
M083	kaempferol	Acetylcholinesterase	ACHE	Cancer
M083	kaempferol	Acetylcholinesterase	ACHE	Infectious diseases
M105	quercetin	Acetylcholinesterase	ACHE	Digestive system disease
M105	quercetin	Acetylcholinesterase	ACHE	Inflammation
M105	quercetin	Acetylcholinesterase	ACHE	Cancer
M105	quercetin	Acetylcholinesterase	ACHE	Infectious diseases
M101	Propylcyclohexane	Alcohol dehydrogenase 1B	ADH1B	Inflammation
M014	1-Propenyl-cyclohexane	Alcohol dehydrogenase 1B	ADH1B	Inflammation
M059	Ethylcyclohexane	Alcohol dehydrogenase 1B	ADH1B	Inflammation
M085	Methylcyclohexane	Alcohol dehydrogenase 1B	ADH1B	Inflammation
M027	4-Hydroxybenzoic acid	Alcohol dehydrogenase 1B	ADH1B	Inflammation
M101	Propylcyclohexane	Alcohol dehydrogenase 1C	ADH1C	Cardiovascular system disease
M014	1-Propenyl-cyclohexane	Alcohol dehydrogenase 1C	ADH1C	Cardiovascular system disease
M059	Ethylcyclohexane	Alcohol dehydrogenase 1C	ADH1C	Cardiovascular system disease
M027	4-Hydroxybenzoic acid	Alcohol dehydrogenase 1C	ADH1C	Cardiovascular system disease
M103	stigmasterol	Alpha-1A adrenergic receptor	ADRA1A	Hypertension
M103	stigmasterol	Alpha-1B adrenergic receptor	ADRA1B	Hypertension
M103	stigmasterol	Alpha-1B adrenergic receptor	ADRA1B	Pain
M083	kaempferol	Alpha-1B adrenergic receptor	ADRA1B	Hypertension
M083	kaempferol	Alpha-1B adrenergic receptor	ADRA1B	Pain
M103	stigmasterol	Alpha-2A adrenergic receptor	ADRA2A	Cardiovascular system disease
M103	stigmasterol	Alpha-2A adrenergic receptor	ADRA2A	Pain
M107	rutin	Alpha-2A adrenergic receptor	ADRA2A	Cardiovascular system disease
M107	rutin	Alpha-2A adrenergic receptor	ADRA2A	Pain
M118	vanillic acid	Alpha-2A adrenergic receptor	ADRA2A	Cardiovascular system disease
M118	vanillic acid	Alpha-2A adrenergic receptor	ADRA2A	Pain
M107	rutin	Alpha-2C adrenergic receptor	ADRA2C	Hypertension
M107	rutin	Alpha-2C adrenergic receptor	ADRA2C	Digestive system disease
M107	rutin	Alpha-2C adrenergic receptor	ADRA2C	Pain
M071	Hyperoside	Alpha-2C adrenergic receptor	ADRA2C	Hypertension
M071	Hyperoside	Alpha-2C adrenergic receptor	ADRA2C	Digestive system disease
M071	Hyperoside	Alpha-2C adrenergic receptor	ADRA2C	Pain
M079	isoquercetin	Alpha-2C adrenergic receptor	ADRA2C	Hypertension
M079	isoquercetin	Alpha-2C adrenergic receptor	ADRA2C	Digestive system disease
M079	isoquercetin	Alpha-2C adrenergic receptor	ADRA2C	Pain
M103	stigmasterol	Beta-1 adrenergic receptor	ADRB1	Hypertension
M103	stigmasterol	Beta-2 adrenergic receptor	ADRB2	Hypertension
M092	oleanolic acid	Beta-2 adrenergic receptor	ADRB2	Hypertension
M105	quercetin	Beta-2 adrenergic receptor	ADRB2	Hypertension
M103	stigmasterol	Aldose reductase	AKR1B1	Inflammation
M103	stigmasterol	Aldose reductase	AKR1B1	Cancer
M110	succinic acid	Aldose reductase	AKR1B1	Inflammation
M110	succinic acid	Aldose reductase	AKR1B1	Cancer
M047	citric acid	Aldose reductase	AKR1B1	Inflammation
M047	citric acid	Aldose reductase	AKR1B1	Cancer
M071	Hyperoside	Aldose reductase	AKR1B1	Inflammation
M071	Hyperoside	Aldose reductase	AKR1B1	Cancer
M079	isoquercetin	Aldose reductase	AKR1B1	Inflammation
M079	isoquercetin	Aldose reductase	AKR1B1	Cancer
M083	kaempferol	Aldose reductase	AKR1B1	Inflammation
M083	kaempferol	Aldose reductase	AKR1B1	Cancer
M045	chlorogenic acid	Aldose reductase	AKR1B1	Inflammation
M045	chlorogenic acid	Aldose reductase	AKR1B1	Cancer
M105	quercetin	Aldose reductase	AKR1B1	Inflammation
M105	quercetin	Aldose reductase	AKR1B1	Cancer
M102	protocatechuic acid	Aldo-keto reductase family 1 member C3	AKR1C3	Cancer
M102	protocatechuic acid	Aldo-keto reductase family 1 member C3	AKR1C3	Pain
M107	rutin	Aldo-keto reductase family 1 member C3	AKR1C3	Cancer
M107	rutin	Aldo-keto reductase family 1 member C3	AKR1C3	Pain
M118	vanillic acid	Aldo-keto reductase family 1 member C3	AKR1C3	Cancer
M118	vanillic acid	Aldo-keto reductase family 1 member C3	AKR1C3	Pain
M083	kaempferol	Aldo-keto reductase family 1 member C3	AKR1C3	Cancer
M083	kaempferol	Aldo-keto reductase family 1 member C3	AKR1C3	Pain
M027	4-Hydroxybenzoic acid	Aldo-keto reductase family 1 member C3	AKR1C3	Cancer
M027	4-Hydroxybenzoic acid	Aldo-keto reductase family 1 member C3	AKR1C3	Pain
M083	kaempferol	RAC-alpha serine/threonine-protein kinase	AKT1	Cardiovascular system disease
M083	kaempferol	RAC-alpha serine/threonine-protein kinase	AKT1	Cancer
M105	quercetin	RAC-alpha serine/threonine-protein kinase	AKT1	Cardiovascular system disease
M105	quercetin	RAC-alpha serine/threonine-protein kinase	AKT1	Cancer
M001	(-)-epicatechin	RAC-alpha serine/threonine-protein kinase	AKT1	Cardiovascular system disease
M001	(-)-epicatechin	RAC-alpha serine/threonine-protein kinase	AKT1	Cancer
M102	protocatechuic acid	Arachidonate 5-lipoxygenase	ALOX5	Atherosclerosis
M102	protocatechuic acid	Arachidonate 5-lipoxygenase	ALOX5	Inflammation
M102	protocatechuic acid	Arachidonate 5-lipoxygenase	ALOX5	Infectious diseases
M107	rutin	Arachidonate 5-lipoxygenase	ALOX5	Atherosclerosis
M107	rutin	Arachidonate 5-lipoxygenase	ALOX5	Inflammation
M107	rutin	Arachidonate 5-lipoxygenase	ALOX5	Infectious diseases
M031	8-Methoxykaempferol 3-neohesperidoside	Arachidonate 5-lipoxygenase	ALOX5	Atherosclerosis
M031	8-Methoxykaempferol 3-neohesperidoside	Arachidonate 5-lipoxygenase	ALOX5	Inflammation
M031	8-Methoxykaempferol 3-neohesperidoside	Arachidonate 5-lipoxygenase	ALOX5	Infectious diseases
M064	gentisic acid	Arachidonate 5-lipoxygenase	ALOX5	Atherosclerosis
M064	gentisic acid	Arachidonate 5-lipoxygenase	ALOX5	Inflammation
M064	gentisic acid	Arachidonate 5-lipoxygenase	ALOX5	Infectious diseases
M083	kaempferol	Arachidonate 5-lipoxygenase	ALOX5	Atherosclerosis
M083	kaempferol	Arachidonate 5-lipoxygenase	ALOX5	Inflammation
M083	kaempferol	Arachidonate 5-lipoxygenase	ALOX5	Infectious diseases
M105	quercetin	Arachidonate 5-lipoxygenase	ALOX5	Atherosclerosis
M105	quercetin	Arachidonate 5-lipoxygenase	ALOX5	Inflammation
M105	quercetin	Arachidonate 5-lipoxygenase	ALOX5	Infectious diseases
M118	vanillic acid	Amyloid beta A4 protein	APP	Cancer
M045	chlorogenic acid	Amyloid-beta A4 protein	APP	Cancer
M119	vitexin	Androgen receptor	AR	Cardiovascular system disease
M119	vitexin	Androgen receptor	AR	Cancer
M119	vitexin	Androgen receptor	AR	Pain
M083	kaempferol	Androgen receptor	AR	Cardiovascular system disease
M083	kaempferol	Androgen receptor	AR	Cancer
M083	kaempferol	Androgen receptor	AR	Pain
M105	quercetin	Androgen receptor	AR	Cardiovascular system disease
M105	quercetin	Androgen receptor	AR	Cancer
M105	quercetin	Androgen receptor	AR	Pain
M002	(−)-epicatechin gallate	Beta-secretase 1	BACE1	Cardiovascular system disease
M002	(−)-epicatechin gallate	Beta-secretase 1	BACE1	Inflammation
M002	(−)-epicatechin gallate	Beta-secretase 1	BACE1	Cancer
M003	(−)-epigallocatechin	Beta-secretase 1	BACE1	Cardiovascular system disease
M003	(−)-epigallocatechin	Beta-secretase 1	BACE1	Inflammation
M003	(−)-epigallocatechin	Beta-secretase 1	BACE1	Cancer
M110	succinic acid	Cholinesterase	BCHE	Cardiovascular system disease
M110	succinic acid	Cholinesterase	BCHE	Inflammation
M110	succinic acid	Cholinesterase	BCHE	Cancer
M002	(−)-epicatechin gallate	Apoptosis regulator Bcl-2	BCL2	Cancer
M116	ursolic acid	Apoptosis regulator Bcl-2	BCL2	Cancer
M078	lupeol	Apoptosis regulator Bcl-2	BCL2	Cancer
M083	kaempferol	Apoptosis regulator Bcl-2	BCL2	Cancer
M105	quercetin	Apoptosis regulator Bcl-2	BCL2	Cancer
M082	malic acid	Betaine--homocysteine S-methyltransferase 1	BHMT	Cardiovascular system disease
M102	protocatechuic acid	Carbonic anhydrase 1	CA1	Inflammation
M102	protocatechuic acid	Carbonic anhydrase 1	CA1	Cancer
M064	gentisic acid	Carbonic anhydrase 1	CA1	Inflammation
M064	gentisic acid	Carbonic anhydrase 1	CA1	Cancer
M105	quercetin	Carbonic anhydrase 1	CA1	Inflammation
M105	quercetin	Carbonic anhydrase 1	CA1	Cancer
M027	4-Hydroxybenzoic acid	Carbonic anhydrase 1	CA1	Inflammation
M027	4-Hydroxybenzoic acid	Carbonic anhydrase 1	CA1	Cancer
M001	(-)-epicatechin	Carbonic anhydrase 1	CA1	Inflammation
M001	(-)-epicatechin	Carbonic anhydrase 1	CA1	Cancer
M102	protocatechuic acid	Carbonic anhydrase 12	CA12	Cancer
M064	gentisic acid	Carbonic anhydrase 12	CA12	Cancer
M071	Hyperoside	Carbonic anhydrase 12	CA12	Cancer
M079	isoquercetin	Carbonic anhydrase 12	CA12	Cancer
M083	kaempferol	Carbonic anhydrase 12	CA12	Cancer
M105	quercetin	Carbonic anhydrase 12	CA12	Cancer
M027	4-Hydroxybenzoic acid	Carbonic anhydrase 12	CA12	Cancer
M001	(-)-epicatechin	Carbonic anhydrase 12	CA12	Cancer
M102	protocatechuic acid	Carbonic anhydrase 14	CA14	Cancer
M118	vanillic acid	Carbonic anhydrase 14	CA14	Cancer
M064	gentisic acid	Carbonic anhydrase 14	CA14	Cancer
M045	chlorogenic acid	Carbonic anhydrase 14	CA14	Cancer
M027	4-Hydroxybenzoic acid	Carbonic anhydrase 14	CA14	Cancer
M102	protocatechuic acid	Carbonic anhydrase 2	CA2	Hypertension
M102	protocatechuic acid	Carbonic anhydrase 2	CA2	Inflammation
M102	protocatechuic acid	Carbonic anhydrase 2	CA2	Cancer
M064	gentisic acid	Carbonic anhydrase 2	CA2	Hypertension
M064	gentisic acid	Carbonic anhydrase 2	CA2	Inflammation
M064	gentisic acid	Carbonic anhydrase 2	CA2	Cancer
M071	Hyperoside	Carbonic anhydrase 2	CA2	Hypertension
M071	Hyperoside	Carbonic anhydrase 2	CA2	Inflammation
M071	Hyperoside	Carbonic anhydrase 2	CA2	Cancer
M079	isoquercetin	Carbonic anhydrase 2	CA2	Hypertension
M079	isoquercetin	Carbonic anhydrase 2	CA2	Inflammation
M079	isoquercetin	Carbonic anhydrase 2	CA2	Cancer
M083	kaempferol	Carbonic anhydrase 2	CA2	Hypertension
M083	kaempferol	Carbonic anhydrase 2	CA2	Inflammation
M083	kaempferol	Carbonic anhydrase 2	CA2	Cancer
M105	quercetin	Carbonic anhydrase 2	CA2	Hypertension
M105	quercetin	Carbonic anhydrase 2	CA2	Inflammation
M105	quercetin	Carbonic anhydrase 2	CA2	Cancer
M027	4-Hydroxybenzoic acid	Carbonic anhydrase 2	CA2	Hypertension
M027	4-Hydroxybenzoic acid	Carbonic anhydrase 2	CA2	Inflammation
M027	4-Hydroxybenzoic acid	Carbonic anhydrase 2	CA2	Cancer
M001	(-)-epicatechin	Carbonic anhydrase 2	CA2	Hypertension
M001	(-)-epicatechin	Carbonic anhydrase 2	CA2	Inflammation
M001	(-)-epicatechin	Carbonic anhydrase 2	CA2	Cancer
M102	protocatechuic acid	Carbonic anhydrase 4	CA4	Hypertension
M102	protocatechuic acid	Carbonic anhydrase 4	CA4	Cancer
M003	(−)-epigallocatechin	Carbonic anhydrase 4	CA4	Hypertension
M003	(−)-epigallocatechin	Carbonic anhydrase 4	CA4	Cancer
M057	Kaempferol-3-neohesperidoside	Carbonic anhydrase 4	CA4	Hypertension
M057	Kaempferol-3-neohesperidoside	Carbonic anhydrase 4	CA4	Cancer
M071	Hyperoside	Carbonic anhydrase 4	CA4	Hypertension
M071	Hyperoside	Carbonic anhydrase 4	CA4	Cancer
M079	isoquercetin	Carbonic anhydrase 4	CA4	Hypertension
M079	isoquercetin	Carbonic anhydrase 4	CA4	Cancer
M083	kaempferol	Carbonic anhydrase 4	CA4	Hypertension
M083	kaempferol	Carbonic anhydrase 4	CA4	Cancer
M105	quercetin	Carbonic anhydrase 4	CA4	Hypertension
M105	quercetin	Carbonic anhydrase 4	CA4	Cancer
M027	4-Hydroxybenzoic acid	Carbonic anhydrase 4	CA4	Hypertension
M027	4-Hydroxybenzoic acid	Carbonic anhydrase 4	CA4	Cancer
M001	(-)-epicatechin	Carbonic anhydrase 4	CA4	Hypertension
M001	(-)-epicatechin	Carbonic anhydrase 4	CA4	Cancer
M102	protocatechuic acid	Carbonic anhydrase 6	CA6	Cancer
M118	vanillic acid	Carbonic anhydrase 6	CA6	Cancer
M045	chlorogenic acid	Carbonic anhydrase 6	CA6	Cancer
M105	quercetin	Carbonic anhydrase 6	CA6	Cancer
M027	4-Hydroxybenzoic acid	Carbonic anhydrase 6	CA6	Cancer
M001	(-)-epicatechin	Carbonic anhydrase 6	CA6	Cancer
M102	protocatechuic acid	Carbonic anhydrase 9	CA9	Cancer
M064	gentisic acid	Carbonic anhydrase 9	CA9	Cancer
M105	quercetin	Carbonic anhydrase 9	CA9	Cancer
M027	4-Hydroxybenzoic acid	Carbonic anhydrase 9	CA9	Cancer
M001	(-)-epicatechin	Carbonic anhydrase 9	CA9	Cancer
M116	ursolic acid	Caspase-8	CASP8	Cancer
M105	quercetin	Caspase-8	CASP8	Cancer
M116	ursolic acid	Caspase-9	CASP9	Cancer
M078	lupeol	Caspase-9	CASP9	Cancer
M105	quercetin	Caspase-9	CASP9	Cancer
M107	rutin	B-cell receptor CD22	CD22	Cancer
M071	Hyperoside	B-cell receptor CD22	CD22	Cancer
M079	isoquercetin	B-cell receptor CD22	CD22	Cancer
M126	β-sitosterol	T-cell surface glycoprotein CD4	CD4	Inflammation
M126	β-sitosterol	T-cell surface glycoprotein CD4	CD4	Cancer
M105	quercetin	CD40 ligand	CD40LG	Immune system disease
M105	quercetin	CD40 ligand	CD40LG	Cancer
M126	β-sitosterol	M-phase inducer phosphatase 1	CDC25A	Cancer
M110	succinic acid	M-phase inducer phosphatase 2	CDC25B	Cancer
M092	oleanolic acid	M-phase inducer phosphatase 2	CDC25B	Cancer
M078	lupeol	M-phase inducer phosphatase 3	CDC25C	Cancer
M078	lupeol	Cell division control protein 2 homolog	CDK1	Cancer
M078	lupeol	Cell division control protein 2 homolog	CDK1	Pain
M083	kaempferol	Cell division control protein 2 homolog	CDK1	Cancer
M083	kaempferol	Cell division control protein 2 homolog	CDK1	Pain
M105	quercetin	Cell division control protein 2 homolog	CDK1	Cancer
M105	quercetin	Cell division control protein 2 homolog	CDK1	Pain
M083	kaempferol	Cyclin-dependent kinase 6	CDK6	Cancer
M103	stigmasterol	Muscarinic acetylcholine receptor M1	CHRM1	Digestive system disease
M103	stigmasterol	Muscarinic acetylcholine receptor M1	CHRM1	Inflammation
M103	stigmasterol	Muscarinic acetylcholine receptor M1	CHRM1	Pain
M083	kaempferol	Muscarinic acetylcholine receptor M1	CHRM1	Digestive system disease
M083	kaempferol	Muscarinic acetylcholine receptor M1	CHRM1	Inflammation
M083	kaempferol	Muscarinic acetylcholine receptor M1	CHRM1	Pain
M103	stigmasterol	Muscarinic acetylcholine receptor M2	CHRM2	Cardiovascular system disease
M103	stigmasterol	Muscarinic acetylcholine receptor M2	CHRM2	Digestive system disease
M083	kaempferol	Muscarinic acetylcholine receptor M2	CHRM2	Cardiovascular system disease
M083	kaempferol	Muscarinic acetylcholine receptor M2	CHRM2	Digestive system disease
M103	stigmasterol	Muscarinic acetylcholine receptor M3	CHRM3	Digestive system disease
M103	stigmasterol	Muscarinic acetylcholine receptor M3	CHRM3	Pain
M110	succinic acid	Cathepsin D	CTSD	Hypertension
M047	citric acid	Cathepsin D	CTSD	Hypertension
M105	quercetin	Cathepsin D	CTSD	Hypertension
M105	quercetin	C-X-C motif chemokine 10	CXCL10	Digestive system disease
M105	quercetin	C-X-C motif chemokine 10	CXCL10	Immune system disease
M103	stigmasterol	Steroid 17-alpha-hydroxylase/17,20 lyase	CYP17A1	Cancer
M125	β-daucosterol	Steroid 17-alpha-hydroxylase/17,20 lyase	CYP17A1	Cancer
M126	β-sitosterol	Steroid 17-alpha-hydroxylase/17,20 lyase	CYP17A1	Cancer
M083	kaempferol	Cytochrome P450 2D6	CYP2D6	Pain
M083	kaempferol	Cytochrome P450 3A4	CYP3A4	Cancer
M105	quercetin	Cytochrome P450 3A4	CYP3A4	Cancer
M107	rutin	Type I iodothyronine deiodinase	DIO1	Inflammation
M083	kaempferol	Type I iodothyronine deiodinase	DIO1	Inflammation
M105	quercetin	Type I iodothyronine deiodinase	DIO1	Inflammation
M083	kaempferol	Dipeptidyl peptidase IV	DPP4	Cancer
M105	quercetin	Dipeptidyl peptidase IV	DPP4	Cancer
M110	succinic acid	Glutamyl aminopeptidase	ENPEP	Hypertension
M037	2-oxiranecarboxylic acid	Glutamyl aminopeptidase	ENPEP	Hypertension
M105	quercetin	Receptor tyrosine-protein kinase erbB-2	ERBB2	Cancer
M002	(−)-epicatechin gallate	Estrogen receptor	ESR1	Hyperlipidemia
M002	(−)-epicatechin gallate	Estrogen receptor	ESR1	Inflammation
M002	(−)-epicatechin gallate	Estrogen receptor	ESR1	Cancer
M002	(−)-epicatechin gallate	Estrogen receptor	ESR1	Pain
M003	(−)-epigallocatechin	Estrogen receptor	ESR1	Hyperlipidemia
M003	(−)-epigallocatechin	Estrogen receptor	ESR1	Inflammation
M003	(−)-epigallocatechin	Estrogen receptor	ESR1	Cancer
M003	(−)-epigallocatechin	Estrogen receptor	ESR1	Pain
M083	kaempferol	Estrogen receptor	ESR1	Hyperlipidemia
M083	kaempferol	Estrogen receptor	ESR1	Inflammation
M083	kaempferol	Estrogen receptor	ESR1	Cancer
M083	kaempferol	Estrogen receptor	ESR1	Pain
M105	quercetin	Estrogen receptor	ESR1	Hyperlipidemia
M105	quercetin	Estrogen receptor	ESR1	Inflammation
M105	quercetin	Estrogen receptor	ESR1	Cancer
M105	quercetin	Estrogen receptor	ESR1	Pain
M027	4-Hydroxybenzoic acid	Estrogen receptor	ESR1	Hyperlipidemia
M027	4-Hydroxybenzoic acid	Estrogen receptor	ESR1	Inflammation
M027	4-Hydroxybenzoic acid	Estrogen receptor	ESR1	Cancer
M027	4-Hydroxybenzoic acid	Estrogen receptor	ESR1	Pain
M001	(-)-epicatechin	Estrogen receptor	ESR1	Hyperlipidemia
M001	(-)-epicatechin	Estrogen receptor	ESR1	Inflammation
M001	(-)-epicatechin	Estrogen receptor	ESR1	Cancer
M001	(-)-epicatechin	Estrogen receptor	ESR1	Pain
M083	kaempferol	Estrogen receptor beta	ESR2	Hyperlipidemia
M083	kaempferol	Estrogen receptor beta	ESR2	Inflammation
M083	kaempferol	Estrogen receptor beta	ESR2	Cancer
M083	kaempferol	Estrogen receptor beta	ESR2	Infectious diseases
M105	quercetin	Estrogen receptor beta	ESR2	Hyperlipidemia
M105	quercetin	Estrogen receptor beta	ESR2	Inflammation
M105	quercetin	Estrogen receptor beta	ESR2	Cancer
M105	quercetin	Estrogen receptor beta	ESR2	Infectious diseases
M027	4-Hydroxybenzoic acid	Estrogen receptor beta	ESR2	Hyperlipidemia
M027	4-Hydroxybenzoic acid	Estrogen receptor beta	ESR2	Inflammation
M027	4-Hydroxybenzoic acid	Estrogen receptor beta	ESR2	Cancer
M027	4-Hydroxybenzoic acid	Estrogen receptor beta	ESR2	Infectious diseases
M083	kaempferol	Steroid hormone receptor ERR1	ESRRA	Digestive system disease
M083	kaempferol	Steroid hormone receptor ERR1	ESRRA	Inflammation
M119	vitexin	Coagulation factor Xa	F10	Thrombosis
M119	vitexin	Coagulation factor Xa	F10	Pain
M047	citric acid	Coagulation factor Xa	F10	Thrombosis
M047	citric acid	Coagulation factor Xa	F10	Pain
M079	isoquercetin	Coagulation factor Xa	F10	Thrombosis
M079	isoquercetin	Coagulation factor Xa	F10	Pain
M105	quercetin	Coagulation factor Xa	F10	Thrombosis
M105	quercetin	Coagulation factor Xa	F10	Pain
M083	kaempferol	Thrombin	F2	Thrombosis
M083	kaempferol	Thrombin	F2	Inflammation
M105	quercetin	Thrombin	F2	Thrombosis
M105	quercetin	Thrombin	F2	Inflammation
M083	kaempferol	Coagulation factor VII	F7	Cancer
M105	quercetin	Coagulation factor VII	F7	Cancer
M121	vitexin-O-rhamnoside	Fibroblast growth factor 1	FGF1	Cardiovascular system disease
M034	amygdalin	Fibroblast growth factor 1	FGF1	Cardiovascular system disease
M057	Kaempferol-3-neohesperidoside	Fibroblast growth factor 1	FGF1	Cardiovascular system disease
M121	vitexin-O-rhamnoside	Fibroblast growth factor 2	FGF2	Atherosclerosis
M121	vitexin-O-rhamnoside	Fibroblast growth factor 2	FGF2	Cancer
M034	amygdalin	Fibroblast growth factor 2	FGF2	Atherosclerosis
M034	amygdalin	Fibroblast growth factor 2	FGF2	Cancer
M057	Kaempferol-3-neohesperidoside	Fibroblast growth factor 2	FGF2	Atherosclerosis
M057	Kaempferol-3-neohesperidoside	Fibroblast growth factor 2	FGF2	Cancer
M083	kaempferol	Receptor-type tyrosine-protein kinase FLT3	FLT3	Immune system disease
M083	kaempferol	Receptor-type tyrosine-protein kinase FLT3	FLT3	Inflammation
M083	kaempferol	Receptor-type tyrosine-protein kinase FLT3	FLT3	Cancer
M083	kaempferol	Receptor-type tyrosine-protein kinase FLT3	FLT3	Pain
M110	succinic acid	Glutamate carboxypeptidase 2	FOLH1	Cardiovascular system disease
M037	2-oxiranecarboxylic acid	Glutamate carboxypeptidase 2	FOLH1	Cardiovascular system disease
M082	malic acid	Glutamate carboxypeptidase 2	FOLH1	Cardiovascular system disease
M103	stigmasterol	Glucose-6-phosphate 1-dehydrogenase	G6PD	Inflammation
M126	β-sitosterol	Glucose-6-phosphate 1-dehydrogenase	G6PD	Inflammation
M116	ursolic acid	Corticosteroid 11-beta-dehydrogenase isozyme 1	HSD11B1	Atherosclerosis
M116	ursolic acid	Corticosteroid 11-beta-dehydrogenase isozyme 1	HSD11B1	Infectious diseases
M051	corosolic acid	Corticosteroid 11-beta-dehydrogenase isozyme 1	HSD11B1	Atherosclerosis
M051	corosolic acid	Corticosteroid 11-beta-dehydrogenase isozyme 1	HSD11B1	Infectious diseases
M003	(−)-epigallocatechin	Heat shock protein HSP 90	HSP90	Immune system disease
M003	(−)-epigallocatechin	Heat shock protein HSP 90	HSP90	Inflammation
M003	(−)-epigallocatechin	Heat shock protein HSP 90	HSP90	Cancer
M034	amygdalin	Heat shock protein HSP 90	HSP90	Immune system disease
M034	amygdalin	Heat shock protein HSP 90	HSP90	Inflammation
M034	amygdalin	Heat shock protein HSP 90	HSP90	Cancer
M071	Hyperoside	Heat shock protein HSP 90	HSP90	Immune system disease
M071	Hyperoside	Heat shock protein HSP 90	HSP90	Inflammation
M071	Hyperoside	Heat shock protein HSP 90	HSP90	Cancer
M083	kaempferol	Heat shock protein HSP 90	HSP90	Immune system disease
M083	kaempferol	Heat shock protein HSP 90	HSP90	Inflammation
M083	kaempferol	Heat shock protein HSP 90	HSP90	Cancer
M092	oleanolic acid	Heat shock protein HSP 90	HSP90	Immune system disease
M092	oleanolic acid	Heat shock protein HSP 90	HSP90	Inflammation
M092	oleanolic acid	Heat shock protein HSP 90	HSP90	Cancer
M105	quercetin	Heat shock protein HSP 90	HSP90	Immune system disease
M105	quercetin	Heat shock protein HSP 90	HSP90	Inflammation
M105	quercetin	Heat shock protein HSP 90	HSP90	Cancer
M001	(-)-epicatechin	Heat shock protein HSP 90	HSP90	Immune system disease
M001	(-)-epicatechin	Heat shock protein HSP 90	HSP90	Inflammation
M001	(-)-epicatechin	Heat shock protein HSP 90	HSP90	Cancer
M103	stigmasterol	5-hydroxytryptamine 2A receptor	HTR2A	Hypertension
M103	stigmasterol	5-hydroxytryptamine 2A receptor	HTR2A	Pain
M116	ursolic acid	Intercellular adhesion molecule 1	ICAM1	Inflammation
M083	kaempferol	Intercellular adhesion molecule 1	ICAM1	Inflammation
M105	quercetin	Intercellular adhesion molecule 1	ICAM1	Inflammation
M105	quercetin	Interferon gamma	IFNG	Cardiovascular system disease
M105	quercetin	Interferon gamma	IFNG	Immune system disease
M034	amygdalin	Cation-independent mannose-6-phosphate receptor	IGF2R	Cancer
M083	kaempferol	Inhibitor of nuclear factor kappa-B kinase subunit beta	IKBKB	Inflammation
M105	quercetin	Interleukin-10	IL10	Cardiovascular system disease
M105	quercetin	Interleukin-10	IL10	Digestive system disease
M105	quercetin	Interleukin-10	IL10	Immune system disease
M105	quercetin	Interleukin-10	IL10	Inflammation
M105	quercetin	Interleukin-1 alpha	IL1A	Cancer
M105	quercetin	Interleukin-1 alpha	IL1A	Infectious diseases
M001	(-)-epicatechin	Interleukin-1 alpha	IL1A	Cancer
M001	(-)-epicatechin	Interleukin-1 alpha	IL1A	Infectious diseases
M107	rutin	Interleukin-1 beta	IL1B	Cardiovascular system disease
M107	rutin	Interleukin-1 beta	IL1B	Immune system disease
M107	rutin	Interleukin-1 beta	IL1B	Inflammation
M107	rutin	Interleukin-1 beta	IL1B	Cancer
M107	rutin	Interleukin-1 beta	IL1B	Pain
M116	ursolic acid	Interleukin-1 beta	IL1B	Cardiovascular system disease
M116	ursolic acid	Interleukin-1 beta	IL1B	Immune system disease
M116	ursolic acid	Interleukin-1 beta	IL1B	Inflammation
M116	ursolic acid	Interleukin-1 beta	IL1B	Cancer
M116	ursolic acid	Interleukin-1 beta	IL1B	Pain
M039	betulin	Interleukin-1 beta	IL1B	Cardiovascular system disease
M039	betulin	Interleukin-1 beta	IL1B	Immune system disease
M039	betulin	Interleukin-1 beta	IL1B	Inflammation
M039	betulin	Interleukin-1 beta	IL1B	Cancer
M039	betulin	Interleukin-1 beta	IL1B	Pain
M078	lupeol	Interleukin-1 beta	IL1B	Cardiovascular system disease
M078	lupeol	Interleukin-1 beta	IL1B	Immune system disease
M078	lupeol	Interleukin-1 beta	IL1B	Inflammation
M078	lupeol	Interleukin-1 beta	IL1B	Cancer
M078	lupeol	Interleukin-1 beta	IL1B	Pain
M105	quercetin	Interleukin-1 beta	IL1B	Cardiovascular system disease
M105	quercetin	Interleukin-1 beta	IL1B	Immune system disease
M105	quercetin	Interleukin-1 beta	IL1B	Inflammation
M105	quercetin	Interleukin-1 beta	IL1B	Cancer
M105	quercetin	Interleukin-1 beta	IL1B	Pain
M107	rutin	Interleukin-2	IL2	Cardiovascular system disease
M107	rutin	Interleukin-2	IL2	Immune system disease
M107	rutin	Interleukin-2	IL2	Inflammation
M107	rutin	Interleukin-2	IL2	Cancer
M119	vitexin	Interleukin-2	IL2	Cardiovascular system disease
M119	vitexin	Interleukin-2	IL2	Immune system disease
M119	vitexin	Interleukin-2	IL2	Inflammation
M119	vitexin	Interleukin-2	IL2	Cancer
M121	vitexin-O-rhamnoside	Interleukin-2	IL2	Cardiovascular system disease
M121	vitexin-O-rhamnoside	Interleukin-2	IL2	Immune system disease
M121	vitexin-O-rhamnoside	Interleukin-2	IL2	Inflammation
M121	vitexin-O-rhamnoside	Interleukin-2	IL2	Cancer
M034	amygdalin	Interleukin-2	IL2	Cardiovascular system disease
M034	amygdalin	Interleukin-2	IL2	Immune system disease
M034	amygdalin	Interleukin-2	IL2	Inflammation
M034	amygdalin	Interleukin-2	IL2	Cancer
M057	Kaempferol-3-neohesperidoside	Interleukin-2	IL2	Cardiovascular system disease
M057	Kaempferol-3-neohesperidoside	Interleukin-2	IL2	Immune system disease
M057	Kaempferol-3-neohesperidoside	Interleukin-2	IL2	Inflammation
M057	Kaempferol-3-neohesperidoside	Interleukin-2	IL2	Cancer
M071	Hyperoside	Interleukin-2	IL2	Cardiovascular system disease
M071	Hyperoside	Interleukin-2	IL2	Immune system disease
M071	Hyperoside	Interleukin-2	IL2	Inflammation
M071	Hyperoside	Interleukin-2	IL2	Cancer
M073	ideain	Interleukin-2	IL2	Cardiovascular system disease
M073	ideain	Interleukin-2	IL2	Immune system disease
M073	ideain	Interleukin-2	IL2	Inflammation
M073	ideain	Interleukin-2	IL2	Cancer
M079	isoquercetin	Interleukin-2	IL2	Cardiovascular system disease
M079	isoquercetin	Interleukin-2	IL2	Immune system disease
M079	isoquercetin	Interleukin-2	IL2	Inflammation
M079	isoquercetin	Interleukin-2	IL2	Cancer
M105	quercetin	Interleukin-2	IL2	Cardiovascular system disease
M105	quercetin	Interleukin-2	IL2	Immune system disease
M105	quercetin	Interleukin-2	IL2	Inflammation
M105	quercetin	Interleukin-2	IL2	Cancer
M001	(-)-epicatechin	Interleukin-2	IL2	Cardiovascular system disease
M001	(-)-epicatechin	Interleukin-2	IL2	Immune system disease
M001	(-)-epicatechin	Interleukin-2	IL2	Inflammation
M001	(-)-epicatechin	Interleukin-2	IL2	Cancer
M107	rutin	Interleukin-6	IL6	Inflammation
M107	rutin	Interleukin-6	IL6	Cancer
M116	ursolic acid	Interleukin-6	IL6	Cancer
M105	quercetin	Interleukin-6	IL6	Cancer
M001	(-)-epicatechin	Interleukin-6	IL6	Cancer
M116	ursolic acid	Interleukin-6	IL6	Inflammation
M105	quercetin	Interleukin-6	IL6	Inflammation
M001	(-)-epicatechin	Interleukin-6	IL6	Inflammation
M013	1-Ethyl-2-methylbenzene	Interleukin-8	IL8	Cardiovascular system disease
M003	(−)-epigallocatechin	Interleukin-8	IL8	Cardiovascular system disease
M105	quercetin	Interleukin-8	IL8	Cardiovascular system disease
M107	rutin	Interleukin-8	IL8	Cardiovascular system disease
M107	rutin	Insulin	INS	Cardiovascular system disease
M083	kaempferol	Insulin receptor	INSR	Hyperlipidemia
M105	quercetin	Insulin receptor	INSR	Hyperlipidemia
M083	kaempferol	Insulin receptor	INSR	Immune system disease
M105	quercetin	Insulin receptor	INSR	Immune system disease
M083	kaempferol	Insulin receptor	INSR	Cancer
M105	quercetin	Insulin receptor	INSR	Cancer
M116	ursolic acid	Transcription factor AP-1	JUN	Inflammation
M083	kaempferol	Transcription factor AP-1	JUN	Inflammation
M105	quercetin	Transcription factor AP-1	JUN	Inflammation
M001	(-)-epicatechin	Transcription factor AP-1	JUN	Inflammation
M105	quercetin	Potassium voltage-gated channel subfamily H member 2	KCNH2	Cardiovascular system disease
M105	quercetin	Potassium voltage-gated channel subfamily H member 2	KCNH2	Cancer
M118	vanillic acid	Leukotriene B4 receptor 1	LTB4R	Digestive system disease
M118	vanillic acid	Leukotriene B4 receptor 1	LTB4R	Immune system disease
M118	vanillic acid	Leukotriene B4 receptor 1	LTB4R	Inflammation
M118	vanillic acid	Leukotriene B4 receptor 1	LTB4R	Cancer
M059	Ethylcyclohexane	Lysozyme	LYZ	Immune system disease
M085	Methylcyclohexane	Lysozyme	LYZ	Immune system disease
M027	4-Hydroxybenzoic acid	Lysozyme	LYZ	Immune system disease
M103	stigmasterol	Amine oxidase [flavin-containing] A	MAOA	Pain
M118	vanillic acid	Amine oxidase [flavin-containing] A	MAOA	Pain
M027	4-Hydroxybenzoic acid	Amine oxidase [flavin-containing] A	MAOA	Pain
M102	protocatechuic acid	Amine oxidase [flavin-containing] B	MAOB	Hypertension
M103	stigmasterol	Amine oxidase [flavin-containing] B	MAOB	Hypertension
M118	vanillic acid	Amine oxidase [flavin-containing] B	MAOB	Hypertension
M064	gentisic acid	Amine oxidase [flavin-containing] B	MAOB	Hypertension
M092	oleanolic acid	Amine oxidase [flavin-containing] B	MAOB	Hypertension
M105	quercetin	Amine oxidase [flavin-containing] B	MAOB	Hypertension
M027	4-Hydroxybenzoic acid	Amine oxidase [flavin-containing] B	MAOB	Hypertension
M102	protocatechuic acid	Amine oxidase [flavin-containing] B	MAOB	Infectious diseases
M103	stigmasterol	Amine oxidase [flavin-containing] B	MAOB	Infectious diseases
M118	vanillic acid	Amine oxidase [flavin-containing] B	MAOB	Infectious diseases
M064	gentisic acid	Amine oxidase [flavin-containing] B	MAOB	Infectious diseases
M092	oleanolic acid	Amine oxidase [flavin-containing] B	MAOB	Infectious diseases
M105	quercetin	Amine oxidase [flavin-containing] B	MAOB	Infectious diseases
M027	4-Hydroxybenzoic acid	Amine oxidase [flavin-containing] B	MAOB	Infectious diseases
M102	protocatechuic acid	Amine oxidase [flavin-containing] B	MAOB	Pain
M103	stigmasterol	Amine oxidase [flavin-containing] B	MAOB	Pain
M118	vanillic acid	Amine oxidase [flavin-containing] B	MAOB	Pain
M064	gentisic acid	Amine oxidase [flavin-containing] B	MAOB	Pain
M092	oleanolic acid	Amine oxidase [flavin-containing] B	MAOB	Pain
M105	quercetin	Amine oxidase [flavin-containing] B	MAOB	Pain
M027	4-Hydroxybenzoic acid	Amine oxidase [flavin-containing] B	MAOB	Pain
M002	(−)-epicatechin gallate	Mitogen-activated protein kinase 14	MAPK14	Cardiovascular system disease
M002	(−)-epicatechin gallate	Mitogen-activated protein kinase 14	MAPK14	Digestive system disease
M002	(−)-epicatechin gallate	Mitogen-activated protein kinase 14	MAPK14	Inflammation
M002	(−)-epicatechin gallate	Mitogen-activated protein kinase 14	MAPK14	Cancer
M002	(−)-epicatechin gallate	Mitogen-activated protein kinase 14	MAPK14	Pain
M116	ursolic acid	Mitogen-activated protein kinase 8	MAPK8	Cancer
M083	kaempferol	Mitogen-activated protein kinase 8	MAPK8	Cancer
M002	(−)-epicatechin gallate	Hepatocyte growth factor receptor	MET	Cardiovascular system disease
M002	(−)-epicatechin gallate	Hepatocyte growth factor receptor	MET	Inflammation
M002	(−)-epicatechin gallate	Hepatocyte growth factor receptor	MET	Cancer
M102	protocatechuic acid	Maltase-glucoamylase, intestinal	MGAM	Cardiovascular system disease
M105	quercetin	Maltase-glucoamylase, intestinal	MGAM	Cardiovascular system disease
M102	protocatechuic acid	Maltase-glucoamylase, intestinal	MGAM	Immune system disease
M105	quercetin	Maltase-glucoamylase, intestinal	MGAM	Immune system disease
M047	citric acid	Macrophage migration inhibitory factor	MIF	Cardiovascular system disease
M047	citric acid	Macrophage migration inhibitory factor	MIF	Immune system disease
M047	citric acid	Macrophage migration inhibitory factor	MIF	Inflammation
M116	ursolic acid	Interstitial collagenase	MMP1	Inflammation
M083	kaempferol	Interstitial collagenase	MMP1	Inflammation
M105	quercetin	Interstitial collagenase	MMP1	Inflammation
M116	ursolic acid	Interstitial collagenase	MMP1	Cancer
M083	kaempferol	Interstitial collagenase	MMP1	Cancer
M105	quercetin	Interstitial collagenase	MMP1	Cancer
M097	procyanidin B2	Matrix metalloproteinase-14	MMP14	Cancer
M116	ursolic acid	72 kDa type IV collagenase	MMP2	Cancer
M105	quercetin	72 kDa type IV collagenase	MMP2	Cancer
M116	ursolic acid	72 kDa type IV collagenase	MMP2	Infectious diseases
M105	quercetin	72 kDa type IV collagenase	MMP2	Infectious diseases
M116	ursolic acid	Stromelysin-1	MMP3	Cardiovascular system disease
M105	quercetin	Stromelysin-1	MMP3	Cardiovascular system disease
M116	ursolic acid	Stromelysin-1	MMP3	Inflammation
M105	quercetin	Stromelysin-1	MMP3	Inflammation
M116	ursolic acid	Stromelysin-1	MMP3	Infectious diseases
M105	quercetin	Stromelysin-1	MMP3	Infectious diseases
M116	ursolic acid	Matrix metalloproteinase-9	MMP9	Inflammation
M045	chlorogenic acid	Matrix metalloproteinase-9	MMP9	Inflammation
M105	quercetin	Matrix metalloproteinase-9	MMP9	Inflammation
M116	ursolic acid	Matrix metalloproteinase-9	MMP9	Cancer
M045	chlorogenic acid	Matrix metalloproteinase-9	MMP9	Cancer
M105	quercetin	Matrix metalloproteinase-9	MMP9	Cancer
M116	ursolic acid	Matrix metalloproteinase-9	MMP9	Infectious diseases
M045	chlorogenic acid	Matrix metalloproteinase-9	MMP9	Infectious diseases
M105	quercetin	Matrix metalloproteinase-9	MMP9	Infectious diseases
M105	quercetin	Myeloperoxidase	MPO	Cardiovascular system disease
M105	quercetin	Myeloperoxidase	MPO	Immune system disease
M105	quercetin	Myeloperoxidase	MPO	Inflammation
M083	kaempferol	Neuraminidase	NEU1	Infectious diseases
M118	vanillic acid	Nuclear factor erythroid 2-related factor 2	NFE2L2	Inflammation
M045	chlorogenic acid	Nuclear factor erythroid 2-related factor 2	NFE2L2	Inflammation
M105	quercetin	Nuclear factor erythroid 2-related factor 2	NFE2L2	Inflammation
M118	vanillic acid	Nuclear factor erythroid 2-related factor 2	NFE2L2	Cancer
M045	chlorogenic acid	Nuclear factor erythroid 2-related factor 2	NFE2L2	Cancer
M105	quercetin	Nuclear factor erythroid 2-related factor 2	NFE2L2	Cancer
M116	ursolic acid	NF-kappa-B inhibitor alpha	NFKBIA	Inflammation
M105	quercetin	NF-kappa-B inhibitor alpha	NFKBIA	Inflammation
M047	citric acid	Nitric oxide synthase, brain	NOS1	Pain
M071	Hyperoside	Nitric oxide synthase, inducible	NOS2	Cardiovascular system disease
M083	kaempferol	Nitric oxide synthase, inducible	NOS2	Cardiovascular system disease
M071	Hyperoside	Nitric oxide synthase, inducible	NOS2	Inflammation
M083	kaempferol	Nitric oxide synthase, inducible	NOS2	Inflammation
M071	Hyperoside	Nitric oxide synthase, inducible	NOS2	Cancer
M083	kaempferol	Nitric oxide synthase, inducible	NOS2	Cancer
M071	Hyperoside	Nitric oxide synthase, inducible	NOS2	Pain
M083	kaempferol	Nitric oxide synthase, inducible	NOS2	Pain
M116	ursolic acid	Nitric oxide synthase, endothelial	NOS3	Hypertension
M118	vanillic acid	Nitric oxide synthase, endothelial	NOS3	Hypertension
M083	kaempferol	Nitric oxide synthase, endothelial	NOS3	Hypertension
M105	quercetin	Nitric oxide synthase, endothelial	NOS3	Hypertension
M116	ursolic acid	Nitric oxide synthase, endothelial	NOS3	Pain
M118	vanillic acid	Nitric oxide synthase, endothelial	NOS3	Pain
M083	kaempferol	Nitric oxide synthase, endothelial	NOS3	Pain
M105	quercetin	Nitric oxide synthase, endothelial	NOS3	Pain
M103	stigmasterol	Niemann-Pick C1-like protein 1	NPC1L1	Cardiovascular system disease
M125	β-daucosterol	Niemann-Pick C1-like protein 1	NPC1L1	Cardiovascular system disease
M126	β-sitosterol	Niemann-Pick C1-like protein 1	NPC1L1	Cardiovascular system disease
M126	β-sitosterol	Oxysterols receptor LXR-alpha	NR1H3	Atherosclerosis
M126	β-sitosterol	Bile acid receptor	NR1H4	Hyperlipidemia
M126	β-sitosterol	Bile acid receptor	NR1H4	Inflammation
M083	kaempferol	Nuclear receptor subfamily 1 group I member 2	NR1I2	Atherosclerosis
M105	quercetin	Nuclear receptor subfamily 1 group I member 2	NR1I2	Atherosclerosis
M083	kaempferol	Nuclear receptor subfamily 1 group I member 3	NR1I3	Digestive system disease
M105	quercetin	Nuclear receptor subfamily 1 group I member 3	NR1I3	Digestive system disease
M103	stigmasterol	Mineralocorticoid receptor	NR3C2	Cardiovascular system disease
M126	β-sitosterol	Mineralocorticoid receptor	NR3C2	Cardiovascular system disease
M092	oleanolic acid	CGMP-inhibited 3',5'-cyclic phosphodiesterase A	PDE3A	Cardiovascular system disease
M047	citric acid	cGMP-specific 3',5'-cyclic phosphodiesterase	PDE5A	Hypertension
M047	citric acid	cGMP-specific 3',5'-cyclic phosphodiesterase	PDE5A	Cancer
M047	citric acid	cGMP-specific 3',5'-cyclic phosphodiesterase	PDE5A	Pain
M002	(−)-epicatechin gallate	Placenta growth factor	PGF	Cancer
M119	vitexin	Placenta growth factor	PGF	Cancer
M003	(−)-epigallocatechin	Placenta growth factor	PGF	Cancer
M083	kaempferol	Placenta growth factor	PGF	Cancer
M097	procyanidin B2	Placenta growth factor	PGF	Cancer
M098	procyanidin B4	Placenta growth factor	PGF	Cancer
M099	procyanidin B5	Placenta growth factor	PGF	Cancer
M105	quercetin	Placenta growth factor	PGF	Cancer
M001	(-)-epicatechin	Placenta growth factor	PGF	Cancer
M103	stigmasterol	Progesterone receptor	PGR	Cancer
M122	α-amyrin	Progesterone receptor	PGR	Cancer
M125	β-daucosterol	Progesterone receptor	PGR	Cancer
M126	β-sitosterol	Progesterone receptor	PGR	Cancer
M078	lupeol	Progesterone receptor	PGR	Cancer
M083	kaempferol	Progesterone receptor	PGR	Cancer
M103	stigmasterol	Progesterone receptor	PGR	Pain
M122	α-amyrin	Progesterone receptor	PGR	Pain
M125	β-daucosterol	Progesterone receptor	PGR	Pain
M126	β-sitosterol	Progesterone receptor	PGR	Pain
M078	lupeol	Progesterone receptor	PGR	Pain
M083	kaempferol	Progesterone receptor	PGR	Pain
M101	Propylcyclohexane	Histone lysine demethylase PHF8	PHF8	Inflammation
M104	pyruvic acid	Histone lysine demethylase PHF8	PHF8	Inflammation
M034	amygdalin	Phosphatidylinositol-4,5-bisphosphate 3-kinase catalytic subunit, gamma isoform	PIK3CG	Cardiovascular system disease
M071	Hyperoside	Phosphatidylinositol-4,5-bisphosphate 3-kinase catalytic subunit, gamma isoform	PIK3CG	Cardiovascular system disease
M083	kaempferol	Phosphatidylinositol-4,5-bisphosphate 3-kinase catalytic subunit, gamma isoform	PIK3CG	Cardiovascular system disease
M105	quercetin	Phosphatidylinositol-4,5-bisphosphate 3-kinase catalytic subunit, gamma isoform	PIK3CG	Cardiovascular system disease
M105	quercetin	Phosphatidylinositol 4,5-bisphosphate 3-kinase catalytic subunit gamma isoform	PIK3CG	Cardiovascular system disease
M034	amygdalin	Phosphatidylinositol-4,5-bisphosphate 3-kinase catalytic subunit, gamma isoform	PIK3CG	Inflammation
M071	Hyperoside	Phosphatidylinositol-4,5-bisphosphate 3-kinase catalytic subunit, gamma isoform	PIK3CG	Inflammation
M083	kaempferol	Phosphatidylinositol-4,5-bisphosphate 3-kinase catalytic subunit, gamma isoform	PIK3CG	Inflammation
M105	quercetin	Phosphatidylinositol-4,5-bisphosphate 3-kinase catalytic subunit, gamma isoform	PIK3CG	Inflammation
M105	quercetin	Phosphatidylinositol 4,5-bisphosphate 3-kinase catalytic subunit gamma isoform	PIK3CG	Inflammation
M034	amygdalin	Phosphatidylinositol-4,5-bisphosphate 3-kinase catalytic subunit, gamma isoform	PIK3CG	Cancer
M071	Hyperoside	Phosphatidylinositol-4,5-bisphosphate 3-kinase catalytic subunit, gamma isoform	PIK3CG	Cancer
M083	kaempferol	Phosphatidylinositol-4,5-bisphosphate 3-kinase catalytic subunit, gamma isoform	PIK3CG	Cancer
M105	quercetin	Phosphatidylinositol-4,5-bisphosphate 3-kinase catalytic subunit, gamma isoform	PIK3CG	Cancer
M105	quercetin	Phosphatidylinositol 4,5-bisphosphate 3-kinase catalytic subunit gamma isoform	PIK3CG	Cancer
M034	amygdalin	Phosphatidylinositol-4,5-bisphosphate 3-kinase catalytic subunit, gamma isoform	PIK3CG	Infectious diseases
M071	Hyperoside	Phosphatidylinositol-4,5-bisphosphate 3-kinase catalytic subunit, gamma isoform	PIK3CG	Infectious diseases
M083	kaempferol	Phosphatidylinositol-4,5-bisphosphate 3-kinase catalytic subunit, gamma isoform	PIK3CG	Infectious diseases
M105	quercetin	Phosphatidylinositol-4,5-bisphosphate 3-kinase catalytic subunit, gamma isoform	PIK3CG	Infectious diseases
M105	quercetin	Phosphatidylinositol 4,5-bisphosphate 3-kinase catalytic subunit gamma isoform	PIK3CG	Infectious diseases
M034	amygdalin	Phosphatidylinositol-4,5-bisphosphate 3-kinase catalytic subunit, gamma isoform	PIK3CG	Pain
M071	Hyperoside	Phosphatidylinositol-4,5-bisphosphate 3-kinase catalytic subunit, gamma isoform	PIK3CG	Pain
M083	kaempferol	Phosphatidylinositol-4,5-bisphosphate 3-kinase catalytic subunit, gamma isoform	PIK3CG	Pain
M105	quercetin	Phosphatidylinositol-4,5-bisphosphate 3-kinase catalytic subunit, gamma isoform	PIK3CG	Pain
M105	quercetin	Phosphatidylinositol 4,5-bisphosphate 3-kinase catalytic subunit gamma isoform	PIK3CG	Pain
M107	rutin	Pyruvate kinase PKM	PKM	Cancer
M107	rutin	Pyruvate kinase PKM	PKM	Pain
M116	ursolic acid	Phospholipase A2	PLA2G1B	Atherosclerosis
M092	oleanolic acid	Phospholipase A2	PLA2G1B	Atherosclerosis
M116	ursolic acid	Phospholipase A2	PLA2G1B	Inflammation
M092	oleanolic acid	Phospholipase A2	PLA2G1B	Inflammation
M103	stigmasterol	Urokinase-type plasminogen activator	PLAU	Cardiovascular system disease
M116	ursolic acid	Urokinase-type plasminogen activator	PLAU	Cardiovascular system disease
M105	quercetin	Urokinase-type plasminogen activator	PLAU	Cardiovascular system disease
M001	(-)-epicatechin	Urokinase-type plasminogen activator	PLAU	Cardiovascular system disease
M103	stigmasterol	Urokinase-type plasminogen activator	PLAU	Cancer
M116	ursolic acid	Urokinase-type plasminogen activator	PLAU	Cancer
M105	quercetin	Urokinase-type plasminogen activator	PLAU	Cancer
M001	(-)-epicatechin	Urokinase-type plasminogen activator	PLAU	Cancer
M078	lupeol	Serine/threonine-protein kinase PLK1	PLK1	Cancer
M107	rutin	NADPH--cytochrome P450 reductase	POR	Inflammation
M105	quercetin	NADPH--cytochrome P450 reductase	POR	Inflammation
M001	(-)-epicatechin	NADPH--cytochrome P450 reductase	POR	Inflammation
M107	rutin	NADPH--cytochrome P450 reductase	POR	Cancer
M105	quercetin	NADPH--cytochrome P450 reductase	POR	Cancer
M001	(-)-epicatechin	NADPH--cytochrome P450 reductase	POR	Cancer
M083	kaempferol	Peroxisome proliferator activated receptor gamma	PPARG	Hyperlipidemia
M105	quercetin	Peroxisome proliferator activated receptor gamma	PPARG	Hyperlipidemia
M083	kaempferol	Peroxisome proliferator activated receptor gamma	PPARG	Digestive system disease
M105	quercetin	Peroxisome proliferator activated receptor gamma	PPARG	Digestive system disease
M083	kaempferol	Peroxisome proliferator activated receptor gamma	PPARG	Immune system disease
M105	quercetin	Peroxisome proliferator activated receptor gamma	PPARG	Immune system disease
M083	kaempferol	Peroxisome proliferator activated receptor gamma	PPARG	Inflammation
M105	quercetin	Peroxisome proliferator activated receptor gamma	PPARG	Inflammation
M083	kaempferol	Peroxisome proliferator activated receptor gamma	PPARG	Pain
M105	quercetin	Peroxisome proliferator activated receptor gamma	PPARG	Pain
M083	kaempferol	Serine/threonine-protein phosphatase 2B catalytic subunit alpha isoform	PPP3CA	Inflammation
M102	protocatechuic acid	Protein kinase C alpha type	PRKCA	Immune system disease
M097	procyanidin B2	Protein kinase C alpha type	PRKCA	Immune system disease
M105	quercetin	Protein kinase C alpha type	PRKCA	Immune system disease
M102	protocatechuic acid	Protein kinase C beta type	PRKCB	Immune system disease
M107	rutin	Protein kinase C beta type	PRKCB	Immune system disease
M097	procyanidin B2	Protein kinase C beta type	PRKCB	Immune system disease
M105	quercetin	Protein kinase C beta type	PRKCB	Immune system disease
M102	protocatechuic acid	Protein kinase C beta type	PRKCB	Cancer
M107	rutin	Protein kinase C beta type	PRKCB	Cancer
M097	procyanidin B2	Protein kinase C beta type	PRKCB	Cancer
M105	quercetin	Protein kinase C beta type	PRKCB	Cancer
M002	(−)-epicatechin gallate	Protein kinase C epsilon type	PRKCE	Cardiovascular system disease
M002	(−)-epicatechin gallate	Protein kinase C epsilon type	PRKCE	Inflammation
M002	(−)-epicatechin gallate	Protein kinase C gamma type	PRKCG	Immune system disease
M102	protocatechuic acid	Protein kinase C gamma type	PRKCG	Immune system disease
M116	ursolic acid	Protein kinase C gamma type	PRKCG	Immune system disease
M002	(−)-epicatechin gallate	Protein kinase C gamma type	PRKCG	Cancer
M102	protocatechuic acid	Protein kinase C gamma type	PRKCG	Cancer
M116	ursolic acid	Protein kinase C gamma type	PRKCG	Cancer
M071	Hyperoside	Trypsin-1	PRSS1	Cardiovascular system disease
M083	kaempferol	Trypsin-1	PRSS1	Cardiovascular system disease
M105	quercetin	Trypsin-1	PRSS1	Cardiovascular system disease
M071	Hyperoside	Trypsin-1	PRSS1	Inflammation
M083	kaempferol	Trypsin-1	PRSS1	Inflammation
M105	quercetin	Trypsin-1	PRSS1	Inflammation
M071	Hyperoside	Trypsin-1	PRSS1	Cancer
M083	kaempferol	Trypsin-1	PRSS1	Cancer
M105	quercetin	Trypsin-1	PRSS1	Cancer
M116	ursolic acid	Prostaglandin E2 receptor EP3 subtype	PTGER3	Cardiovascular system disease
M105	quercetin	Prostaglandin E2 receptor EP3 subtype	PTGER3	Cardiovascular system disease
M116	ursolic acid	Prostaglandin E2 receptor EP3 subtype	PTGER3	Cancer
M105	quercetin	Prostaglandin E2 receptor EP3 subtype	PTGER3	Cancer
M116	ursolic acid	Prostaglandin E2 receptor EP3 subtype	PTGER3	Pain
M105	quercetin	Prostaglandin E2 receptor EP3 subtype	PTGER3	Pain
M102	protocatechuic acid	Prostaglandin G/H synthase 1	PTGS1	Cardiovascular system disease
M103	stigmasterol	Prostaglandin G/H synthase 1	PTGS1	Cardiovascular system disease
M116	ursolic acid	Prostaglandin G/H synthase 1	PTGS1	Cardiovascular system disease
M118	vanillic acid	Prostaglandin G/H synthase 1	PTGS1	Cardiovascular system disease
M003	(−)-epigallocatechin	Prostaglandin G/H synthase 1	PTGS1	Cardiovascular system disease
M034	amygdalin	Prostaglandin G/H synthase 1	PTGS1	Cardiovascular system disease
M064	gentisic acid	Prostaglandin G/H synthase 1	PTGS1	Cardiovascular system disease
M071	Hyperoside	Prostaglandin G/H synthase 1	PTGS1	Cardiovascular system disease
M083	kaempferol	Prostaglandin G/H synthase 1	PTGS1	Cardiovascular system disease
M092	oleanolic acid	Prostaglandin G/H synthase 1	PTGS1	Cardiovascular system disease
M105	quercetin	Prostaglandin G/H synthase 1	PTGS1	Cardiovascular system disease
M001	(-)-epicatechin	Prostaglandin G/H synthase 1	PTGS1	Cardiovascular system disease
M102	protocatechuic acid	Prostaglandin G/H synthase 1	PTGS1	Inflammation
M103	stigmasterol	Prostaglandin G/H synthase 1	PTGS1	Inflammation
M116	ursolic acid	Prostaglandin G/H synthase 1	PTGS1	Inflammation
M118	vanillic acid	Prostaglandin G/H synthase 1	PTGS1	Inflammation
M003	(−)-epigallocatechin	Prostaglandin G/H synthase 1	PTGS1	Inflammation
M034	amygdalin	Prostaglandin G/H synthase 1	PTGS1	Inflammation
M064	gentisic acid	Prostaglandin G/H synthase 1	PTGS1	Inflammation
M071	Hyperoside	Prostaglandin G/H synthase 1	PTGS1	Inflammation
M083	kaempferol	Prostaglandin G/H synthase 1	PTGS1	Inflammation
M092	oleanolic acid	Prostaglandin G/H synthase 1	PTGS1	Inflammation
M105	quercetin	Prostaglandin G/H synthase 1	PTGS1	Inflammation
M001	(-)-epicatechin	Prostaglandin G/H synthase 1	PTGS1	Inflammation
M102	protocatechuic acid	Prostaglandin G/H synthase 1	PTGS1	Cancer
M103	stigmasterol	Prostaglandin G/H synthase 1	PTGS1	Cancer
M116	ursolic acid	Prostaglandin G/H synthase 1	PTGS1	Cancer
M118	vanillic acid	Prostaglandin G/H synthase 1	PTGS1	Cancer
M003	(−)-epigallocatechin	Prostaglandin G/H synthase 1	PTGS1	Cancer
M034	amygdalin	Prostaglandin G/H synthase 1	PTGS1	Cancer
M064	gentisic acid	Prostaglandin G/H synthase 1	PTGS1	Cancer
M071	Hyperoside	Prostaglandin G/H synthase 1	PTGS1	Cancer
M083	kaempferol	Prostaglandin G/H synthase 1	PTGS1	Cancer
M092	oleanolic acid	Prostaglandin G/H synthase 1	PTGS1	Cancer
M105	quercetin	Prostaglandin G/H synthase 1	PTGS1	Cancer
M001	(-)-epicatechin	Prostaglandin G/H synthase 1	PTGS1	Cancer
M102	protocatechuic acid	Prostaglandin G/H synthase 1	PTGS1	Pain
M103	stigmasterol	Prostaglandin G/H synthase 1	PTGS1	Pain
M116	ursolic acid	Prostaglandin G/H synthase 1	PTGS1	Pain
M118	vanillic acid	Prostaglandin G/H synthase 1	PTGS1	Pain
M003	(−)-epigallocatechin	Prostaglandin G/H synthase 1	PTGS1	Pain
M034	amygdalin	Prostaglandin G/H synthase 1	PTGS1	Pain
M064	gentisic acid	Prostaglandin G/H synthase 1	PTGS1	Pain
M071	Hyperoside	Prostaglandin G/H synthase 1	PTGS1	Pain
M083	kaempferol	Prostaglandin G/H synthase 1	PTGS1	Pain
M092	oleanolic acid	Prostaglandin G/H synthase 1	PTGS1	Pain
M105	quercetin	Prostaglandin G/H synthase 1	PTGS1	Pain
M001	(-)-epicatechin	Prostaglandin G/H synthase 1	PTGS1	Pain
M102	protocatechuic acid	Prostaglandin G/H synthase 2	PTGS2	Cardiovascular system disease
M103	stigmasterol	Prostaglandin G/H synthase 2	PTGS2	Cardiovascular system disease
M116	ursolic acid	Prostaglandin G/H synthase 2	PTGS2	Cardiovascular system disease
M118	vanillic acid	Prostaglandin G/H synthase 2	PTGS2	Cardiovascular system disease
M119	vitexin	Prostaglandin G/H synthase 2	PTGS2	Cardiovascular system disease
M003	(−)-epigallocatechin	Prostaglandin G/H synthase 2	PTGS2	Cardiovascular system disease
M034	amygdalin	Prostaglandin G/H synthase 2	PTGS2	Cardiovascular system disease
M047	citric acid	Prostaglandin G/H synthase 2	PTGS2	Cardiovascular system disease
M064	gentisic acid	Prostaglandin G/H synthase 2	PTGS2	Cardiovascular system disease
M071	Hyperoside	Prostaglandin G/H synthase 2	PTGS2	Cardiovascular system disease
M083	kaempferol	Prostaglandin G/H synthase 2	PTGS2	Cardiovascular system disease
M092	oleanolic acid	Prostaglandin G/H synthase 2	PTGS2	Cardiovascular system disease
M097	procyanidin B2	Prostaglandin G/H synthase 2	PTGS2	Cardiovascular system disease
M045	chlorogenic acid	Prostaglandin G/H synthase 2	PTGS2	Cardiovascular system disease
M105	quercetin	Prostaglandin G/H synthase 2	PTGS2	Cardiovascular system disease
M001	(-)-epicatechin	Prostaglandin G/H synthase 2	PTGS2	Cardiovascular system disease
M102	protocatechuic acid	Prostaglandin G/H synthase 2	PTGS2	Inflammation
M103	stigmasterol	Prostaglandin G/H synthase 2	PTGS2	Inflammation
M116	ursolic acid	Prostaglandin G/H synthase 2	PTGS2	Inflammation
M118	vanillic acid	Prostaglandin G/H synthase 2	PTGS2	Inflammation
M119	vitexin	Prostaglandin G/H synthase 2	PTGS2	Inflammation
M003	(−)-epigallocatechin	Prostaglandin G/H synthase 2	PTGS2	Inflammation
M034	amygdalin	Prostaglandin G/H synthase 2	PTGS2	Inflammation
M047	citric acid	Prostaglandin G/H synthase 2	PTGS2	Inflammation
M064	gentisic acid	Prostaglandin G/H synthase 2	PTGS2	Inflammation
M071	Hyperoside	Prostaglandin G/H synthase 2	PTGS2	Inflammation
M083	kaempferol	Prostaglandin G/H synthase 2	PTGS2	Inflammation
M092	oleanolic acid	Prostaglandin G/H synthase 2	PTGS2	Inflammation
M097	procyanidin B2	Prostaglandin G/H synthase 2	PTGS2	Inflammation
M045	chlorogenic acid	Prostaglandin G/H synthase 2	PTGS2	Inflammation
M105	quercetin	Prostaglandin G/H synthase 2	PTGS2	Inflammation
M001	(-)-epicatechin	Prostaglandin G/H synthase 2	PTGS2	Inflammation
M102	protocatechuic acid	Prostaglandin G/H synthase 2	PTGS2	Cancer
M103	stigmasterol	Prostaglandin G/H synthase 2	PTGS2	Cancer
M116	ursolic acid	Prostaglandin G/H synthase 2	PTGS2	Cancer
M118	vanillic acid	Prostaglandin G/H synthase 2	PTGS2	Cancer
M119	vitexin	Prostaglandin G/H synthase 2	PTGS2	Cancer
M003	(−)-epigallocatechin	Prostaglandin G/H synthase 2	PTGS2	Cancer
M034	amygdalin	Prostaglandin G/H synthase 2	PTGS2	Cancer
M047	citric acid	Prostaglandin G/H synthase 2	PTGS2	Cancer
M064	gentisic acid	Prostaglandin G/H synthase 2	PTGS2	Cancer
M071	Hyperoside	Prostaglandin G/H synthase 2	PTGS2	Cancer
M083	kaempferol	Prostaglandin G/H synthase 2	PTGS2	Cancer
M092	oleanolic acid	Prostaglandin G/H synthase 2	PTGS2	Cancer
M097	procyanidin B2	Prostaglandin G/H synthase 2	PTGS2	Cancer
M045	chlorogenic acid	Prostaglandin G/H synthase 2	PTGS2	Cancer
M105	quercetin	Prostaglandin G/H synthase 2	PTGS2	Cancer
M001	(-)-epicatechin	Prostaglandin G/H synthase 2	PTGS2	Cancer
M102	protocatechuic acid	Prostaglandin G/H synthase 2	PTGS2	Pain
M103	stigmasterol	Prostaglandin G/H synthase 2	PTGS2	Pain
M116	ursolic acid	Prostaglandin G/H synthase 2	PTGS2	Pain
M118	vanillic acid	Prostaglandin G/H synthase 2	PTGS2	Pain
M119	vitexin	Prostaglandin G/H synthase 2	PTGS2	Pain
M003	(−)-epigallocatechin	Prostaglandin G/H synthase 2	PTGS2	Pain
M034	amygdalin	Prostaglandin G/H synthase 2	PTGS2	Pain
M047	citric acid	Prostaglandin G/H synthase 2	PTGS2	Pain
M064	gentisic acid	Prostaglandin G/H synthase 2	PTGS2	Pain
M071	Hyperoside	Prostaglandin G/H synthase 2	PTGS2	Pain
M083	kaempferol	Prostaglandin G/H synthase 2	PTGS2	Pain
M092	oleanolic acid	Prostaglandin G/H synthase 2	PTGS2	Pain
M097	procyanidin B2	Prostaglandin G/H synthase 2	PTGS2	Pain
M045	chlorogenic acid	Prostaglandin G/H synthase 2	PTGS2	Pain
M105	quercetin	Prostaglandin G/H synthase 2	PTGS2	Pain
M001	(-)-epicatechin	Prostaglandin G/H synthase 2	PTGS2	Pain
M116	ursolic acid	Tyrosine-protein phosphatase non-receptor type 1	PTPN1	Cardiovascular system disease
M117	uvaol	Tyrosine-protein phosphatase non-receptor type 1	PTPN1	Cardiovascular system disease
M122	α-amyrin	Tyrosine-protein phosphatase non-receptor type 1	PTPN1	Cardiovascular system disease
M123	β-amyrin	Tyrosine-protein phosphatase non-receptor type 1	PTPN1	Cardiovascular system disease
M039	betulin	Tyrosine-protein phosphatase non-receptor type 1	PTPN1	Cardiovascular system disease
M051	corosolic acid	Tyrosine-protein phosphatase non-receptor type 1	PTPN1	Cardiovascular system disease
M052	Maslinic acid	Tyrosine-protein phosphatase non-receptor type 1	PTPN1	Cardiovascular system disease
M078	lupeol	Tyrosine-protein phosphatase non-receptor type 1	PTPN1	Cardiovascular system disease
M092	oleanolic acid	Tyrosine-protein phosphatase non-receptor type 1	PTPN1	Cardiovascular system disease
M116	ursolic acid	Tyrosine-protein phosphatase non-receptor type 6	PTPN6	Cancer
M117	uvaol	Tyrosine-protein phosphatase non-receptor type 6	PTPN6	Cancer
M039	betulin	Tyrosine-protein phosphatase non-receptor type 6	PTPN6	Cancer
M052	Maslinic acid	Tyrosine-protein phosphatase non-receptor type 6	PTPN6	Cancer
M092	oleanolic acid	Tyrosine-protein phosphatase non-receptor type 6	PTPN6	Cancer
M116	ursolic acid	Glycogen phosphorylase, muscle form	PYGM	Cardiovascular system disease
M039	betulin	Glycogen phosphorylase, muscle form	PYGM	Cardiovascular system disease
M092	oleanolic acid	Glycogen phosphorylase, muscle form	PYGM	Cardiovascular system disease
M102	protocatechuic acid	Retinoic acid receptor alpha	RARA	Immune system disease
M118	vanillic acid	Retinoic acid receptor alpha	RARA	Immune system disease
M027	4-Hydroxybenzoic acid	Retinoic acid receptor alpha	RARA	Immune system disease
M102	protocatechuic acid	Retinoic acid receptor alpha	RARA	Cancer
M118	vanillic acid	Retinoic acid receptor alpha	RARA	Cancer
M027	4-Hydroxybenzoic acid	Retinoic acid receptor alpha	RARA	Cancer
M102	protocatechuic acid	Retinoic acid receptor gamma	RARG	Inflammation
M118	vanillic acid	Retinoic acid receptor gamma	RARG	Inflammation
M027	4-Hydroxybenzoic acid	Retinoic acid receptor gamma	RARG	Inflammation
M107	rutin	Transcription factor p65	RELA	Inflammation
M116	ursolic acid	Transcription factor p65	RELA	Inflammation
M083	kaempferol	Transcription factor p65	RELA	Inflammation
M105	quercetin	Transcription factor p65	RELA	Inflammation
M102	protocatechuic acid	Retinoic acid receptor RXR-alpha	RXRA	Cancer
M103	stigmasterol	Retinoic acid receptor RXR-alpha	RXRA	Cancer
M118	vanillic acid	Retinoic acid receptor RXR-alpha	RXRA	Cancer
M092	oleanolic acid	Retinoic acid receptor RXR-alpha	RXRA	Cancer
M105	quercetin	Retinoic acid receptor RXR-alpha	RXRA	Cancer
M027	4-Hydroxybenzoic acid	Retinoic acid receptor RXR-alpha	RXRA	Cancer
M001	(-)-epicatechin	Retinoic acid receptor RXR-alpha	RXRA	Cancer
M102	protocatechuic acid	Retinoic acid receptor RXR-gamma	RXRG	Cardiovascular system disease
M118	vanillic acid	Retinoic acid receptor RXR-gamma	RXRG	Cardiovascular system disease
M027	4-Hydroxybenzoic acid	Retinoic acid receptor RXR-gamma	RXRG	Cardiovascular system disease
M102	protocatechuic acid	Retinoic acid receptor RXR-gamma	RXRG	Cancer
M118	vanillic acid	Retinoic acid receptor RXR-gamma	RXRG	Cancer
M027	4-Hydroxybenzoic acid	Retinoic acid receptor RXR-gamma	RXRG	Cancer
M013	1-Ethyl-2-methylbenzene	Sodium channel protein type 4 subunit alpha	SCN4A	Pain
M008	1,2,3-Trimethylbenzene	Sodium channel protein type 4 subunit alpha	SCN4A	Pain
M103	stigmasterol	Sodium channel protein type 5 subunit alpha	SCN5A	Cardiovascular system disease
M105	quercetin	Sodium channel protein type 5 subunit alpha	SCN5A	Cardiovascular system disease
M103	stigmasterol	Sodium channel protein type 5 subunit alpha	SCN5A	Infectious diseases
M105	quercetin	Sodium channel protein type 5 subunit alpha	SCN5A	Infectious diseases
M103	stigmasterol	Sodium channel protein type 5 subunit alpha	SCN5A	Pain
M105	quercetin	Sodium channel protein type 5 subunit alpha	SCN5A	Pain
M116	ursolic acid	E-selectin	SELE	Hypertension
M083	kaempferol	E-selectin	SELE	Hypertension
M105	quercetin	E-selectin	SELE	Hypertension
M116	ursolic acid	E-selectin	SELE	Digestive system disease
M083	kaempferol	E-selectin	SELE	Digestive system disease
M105	quercetin	E-selectin	SELE	Digestive system disease
M116	ursolic acid	E-selectin	SELE	Inflammation
M083	kaempferol	E-selectin	SELE	Inflammation
M105	quercetin	E-selectin	SELE	Inflammation
M034	amygdalin	L-selectin	SELL	Inflammation
M103	stigmasterol	Corticosteroid-binding globulin	SERPINA6	Cardiovascular system disease
M126	β-sitosterol	Corticosteroid-binding globulin	SERPINA6	Cardiovascular system disease
M103	stigmasterol	Corticosteroid-binding globulin	SERPINA6	Inflammation
M126	β-sitosterol	Corticosteroid-binding globulin	SERPINA6	Inflammation
M002	(−)-epicatechin gallate	Plasminogen activator inhibitor 1	SERPINE1	Cardiovascular system disease
M105	quercetin	Plasminogen activator inhibitor 1	SERPINE1	Cardiovascular system disease
M002	(−)-epicatechin gallate	Plasminogen activator inhibitor 1	SERPINE1	Cancer
M105	quercetin	Plasminogen activator inhibitor 1	SERPINE1	Cancer
M126	β-sitosterol	Ileal sodium/bile acid cotransporter	SLC10A2	Hyperlipidemia
M083	kaempferol	Solute carrier family 2, facilitated glucose transporter member 4	SLC2A4	Cardiovascular system disease
M105	quercetin	Solute carrier family 2, facilitated glucose transporter member 4	SLC2A4	Cardiovascular system disease
M034	amygdalin	Sodium/glucose cotransporter 1	SLC5A1	Cardiovascular system disease
M057	Kaempferol-3-neohesperidoside	Sodium/glucose cotransporter 1	SLC5A1	Cardiovascular system disease
M071	Hyperoside	Sodium/glucose cotransporter 1	SLC5A1	Cardiovascular system disease
M073	ideain	Sodium/glucose cotransporter 1	SLC5A1	Cardiovascular system disease
M079	isoquercetin	Sodium/glucose cotransporter 1	SLC5A1	Cardiovascular system disease
M119	vitexin	Sodium/glucose cotransporter 2	SLC5A2	Cardiovascular system disease
M121	vitexin-O-rhamnoside	Sodium/glucose cotransporter 2	SLC5A2	Cardiovascular system disease
M034	amygdalin	Sodium/glucose cotransporter 2	SLC5A2	Cardiovascular system disease
M057	Kaempferol-3-neohesperidoside	Sodium/glucose cotransporter 2	SLC5A2	Cardiovascular system disease
M071	Hyperoside	Sodium/glucose cotransporter 2	SLC5A2	Cardiovascular system disease
M073	ideain	Sodium/glucose cotransporter 2	SLC5A2	Cardiovascular system disease
M079	isoquercetin	Sodium/glucose cotransporter 2	SLC5A2	Cardiovascular system disease
M119	vitexin	Low affinity sodium-glucose cotransporter	SLC5A4	Cardiovascular system disease
M103	stigmasterol	Sodium-dependent noradrenaline transporter	SLC6A2	Cancer
M083	kaempferol	Sodium-dependent noradrenaline transporter	SLC6A2	Cancer
M103	stigmasterol	Sodium-dependent noradrenaline transporter	SLC6A2	Pain
M083	kaempferol	Sodium-dependent noradrenaline transporter	SLC6A2	Pain
M092	oleanolic acid	Sodium-dependent serotonin transporter	SLC6A4	Digestive system disease
M092	oleanolic acid	Sodium-dependent serotonin transporter	SLC6A4	Cancer
M092	oleanolic acid	Sodium-dependent serotonin transporter	SLC6A4	Pain
M110	succinic acid	Proto-oncogene tyrosine-protein kinase SRC	SRC	Cancer
M047	citric acid	Proto-oncogene tyrosine-protein kinase SRC	SRC	Cancer
M083	kaempferol	Signal transducer and activator of transcription 1-alpha/beta	STAT1	Infectious diseases
M105	quercetin	Signal transducer and activator of transcription 1-alpha/beta	STAT1	Infectious diseases
M116	ursolic acid	Signal transducer and activator of transcription 3	STAT3	Cancer
M107	rutin	Thromboxane A2 receptor	TBXA2R	Cardiovascular system disease
M107	rutin	Thromboxane A2 receptor	TBXA2R	Inflammation
M107	rutin	Tumor necrosis factor	TNF	Cardiovascular system disease
M116	ursolic acid	Tumor necrosis factor	TNF	Cardiovascular system disease
M083	kaempferol	Tumor necrosis factor	TNF	Cardiovascular system disease
M105	quercetin	Tumor necrosis factor	TNF	Cardiovascular system disease
M001	(-)-epicatechin	Tumor necrosis factor	TNF	Cardiovascular system disease
M107	rutin	Tumor necrosis factor	TNF	Inflammation
M116	ursolic acid	Tumor necrosis factor	TNF	Inflammation
M083	kaempferol	Tumor necrosis factor	TNF	Inflammation
M105	quercetin	Tumor necrosis factor	TNF	Inflammation
M001	(-)-epicatechin	Tumor necrosis factor	TNF	Inflammation
M107	rutin	Tumor necrosis factor	TNF	Cancer
M116	ursolic acid	Tumor necrosis factor	TNF	Cancer
M083	kaempferol	Tumor necrosis factor	TNF	Cancer
M105	quercetin	Tumor necrosis factor	TNF	Cancer
M001	(-)-epicatechin	Tumor necrosis factor	TNF	Cancer
M118	vanillic acid	Tumor necrosis factor receptor superfamily member 1A	TNFRSF1A	Cardiovascular system disease
M118	vanillic acid	Tumor necrosis factor receptor superfamily member 1A	TNFRSF1A	Digestive system disease
M118	vanillic acid	Tumor necrosis factor receptor superfamily member 1A	TNFRSF1A	Inflammation
M118	vanillic acid	Tumor necrosis factor receptor superfamily member 1A	TNFRSF1A	Cancer
M047	citric acid	Tumor necrosis factor ligand superfamily member 13B	TNFSF13B	Inflammation
M047	citric acid	Tumor necrosis factor ligand superfamily member 13B	TNFSF13B	Cancer
M119	vitexin	DNA topoisomerase 1	TOP1	Cancer
M105	quercetin	DNA topoisomerase 1	TOP1	Cancer
M118	vanillic acid	Tubulin beta-1 chain	TUBB1	Cancer
M119	vitexin	Tyrosinase	TYR	Inflammation
M121	vitexin-O-rhamnoside	Tyrosinase	TYR	Inflammation
M125	β-daucosterol	Tyrosinase	TYR	Inflammation
M034	amygdalin	Tyrosinase	TYR	Inflammation
M057	Kaempferol-3-neohesperidoside	Tyrosinase	TYR	Inflammation
M071	Hyperoside	Tyrosinase	TYR	Inflammation
M073	ideain	Tyrosinase	TYR	Inflammation
M079	isoquercetin	Tyrosinase	TYR	Inflammation
M119	vitexin	Tyrosinase	TYR	Cancer
M121	vitexin-O-rhamnoside	Tyrosinase	TYR	Cancer
M125	β-daucosterol	Tyrosinase	TYR	Cancer
M034	amygdalin	Tyrosinase	TYR	Cancer
M057	Kaempferol-3-neohesperidoside	Tyrosinase	TYR	Cancer
M071	Hyperoside	Tyrosinase	TYR	Cancer
M073	ideain	Tyrosinase	TYR	Cancer
M079	isoquercetin	Tyrosinase	TYR	Cancer
M126	β-sitosterol	Vitamin D3 receptor	VDR	Inflammation
M126	β-sitosterol	Vitamin D3 receptor	VDR	Cancer
M116	ursolic acid	Vascular endothelial growth factor A	VEGFA	Cancer
M121	vitexin-O-rhamnoside	Vascular endothelial growth factor A	VEGFA	Cancer
M003	(−)-epigallocatechin	Vascular endothelial growth factor A	VEGFA	Cancer
M034	amygdalin	Vascular endothelial growth factor A	VEGFA	Cancer
M097	procyanidin B2	Vascular endothelial growth factor A	VEGFA	Cancer
M098	procyanidin B4	Vascular endothelial growth factor A	VEGFA	Cancer
M099	procyanidin B5	Vascular endothelial growth factor A	VEGFA	Cancer
M105	quercetin	Vascular endothelial growth factor A	VEGFA	Cancer
M001	(-)-epicatechin	Vascular endothelial growth factor A	VEGFA	Cancer
M107	rutin	Xanthine dehydrogenase/oxidase	XDH	Cardiovascular system disease
M119	vitexin	Xanthine dehydrogenase/oxidase	XDH	Cardiovascular system disease
M121	vitexin-O-rhamnoside	Xanthine dehydrogenase/oxidase	XDH	Cardiovascular system disease
M057	Kaempferol-3-neohesperidoside	Xanthine dehydrogenase/oxidase	XDH	Cardiovascular system disease
M071	Hyperoside	Xanthine dehydrogenase/oxidase	XDH	Cardiovascular system disease
M079	isoquercetin	Xanthine dehydrogenase/oxidase	XDH	Cardiovascular system disease
M083	kaempferol	Xanthine dehydrogenase/oxidase	XDH	Cardiovascular system disease
M105	quercetin	Xanthine dehydrogenase/oxidase	XDH	Cardiovascular system disease
M107	rutin	Xanthine dehydrogenase/oxidase	XDH	Cancer
M119	vitexin	Xanthine dehydrogenase/oxidase	XDH	Cancer
M121	vitexin-O-rhamnoside	Xanthine dehydrogenase/oxidase	XDH	Cancer
M057	Kaempferol-3-neohesperidoside	Xanthine dehydrogenase/oxidase	XDH	Cancer
M071	Hyperoside	Xanthine dehydrogenase/oxidase	XDH	Cancer
M079	isoquercetin	Xanthine dehydrogenase/oxidase	XDH	Cancer
M083	kaempferol	Xanthine dehydrogenase/oxidase	XDH	Cancer
M105	quercetin	Xanthine dehydrogenase/oxidase	XDH	Cancer
