# Supplementary material for: A systems-based analysis to explore the multiple mechanisms of Shan Zha for treating human diseases
Source: Royal Society of Chemistry journal article supplement (doi:10.1039/d0fo02433c), 2020-12-16
Supplement: d0fo02433c2.xlsx [file d0fo02433c2.xlsx]

## Sheet: Sheet1
Diseases	KEGG ID	Pathways	Related targets
Cancer	hsa05200	Pathways in cancer	AKT1,AKR1B1,AR,BAX,BCL2,CASP8,CASP9,CDK6,ERBB2,ESR1,ESR2,FGF2,FLT3,HSP90AA1,IL2,IL6,MET,MMP1,MMP2,MMP9,NFE2L2,NOS2,PGF,PRKCB,PRKCG,MAPK8,PTGER3,PTGS2,RARA,RARB,RXRA,RXRG,STAT3,TP53,VEGFA
	hsa05163	human cytomegalovirus infection	AKT1,BAX,CASP8,CASP9,CDK6,MAPK14,IL1B,IL6,PRKCB,PRKCG,PTGER3,PTGS2,SRC,STAT3,TNF,TNFRSF1A,TP53,VEGFA
	hsa05223	Non-small cell lung cancer	AKT1,BAX,CASP9,CDK6,ERBB2,PRKCB,PRKCG,RARB,RXRA,RXRG,STAT3,TP53
	hsa01522	Endocrine resistance	AKT1,BAX,BCL2,MAPK14,ERBB2,ESR1,ESR2,MMP2,MMP9,MAPK8,SRC,TP53
	hsa05206	MicroRNAs in cancer	BCL2,CDC25A,CDC25B,CDC25C,CDK6,ERBB2,MET,MMP9,ABCB1,PLAU,PRKCB,PRKCG,PTGS2,STAT3,TP53,VEGFA
	hsa05162	Measles	AKT1,BAX,BCL2,CASP8,CASP9,CDK6,IL1A,IL1B,IL2,IL6,MAPK8,STAT3,TP53
	hsa04659	Th17 cell differentiation	CD4,MAPK14,HSP90AA1,IL1B,IL2,IL6,MAPK8,RARA,RXRA,RXRG,STAT3
	hsa00910	Nitrogen metabolism	CA1,CA2,CA4,CA6,CA9,CA12,CA14
Cardiovascular system disease	hsa05202	Transcriptional misregulation in cancer	CXCL8,MET,MMP3,MPO,PLAU,PPARG,RXRG
	hsa05200	Pathways in cancer	AKT1,AR,ESR1,ESR2,F2,FGF1,FGF2,IFNG,IL2,CXCL8,MET,NOS2,PPARG,PTGER3,PTGS2,RXRG
	hsa04931	insulin resistance	AKT1,INS,INSR,NOS3,PRKCE,PTPN1,PYGM,SLC2A4,TNF,TNFRSF1A,NR1H3
	hsa04611	Platelet activation	AKT1,MAPK14,F2,NOS3,PIK3CG,PTGS1,TBXA2R
	hsa04151	PI3K-Akt signaling pathway	AKT1,CHRM2,FGF1,FGF2,IL2,INS,INSR,MET,NOS3,PIK3CG
	hsa04066	HIF-1 signaling pathway	AKT1,IFNG,INS,INSR,NOS2,NOS3,SERPINE1
	hsa04022	cGMP-PKG signaling pathway	ADRA1B,ADRA1A,ADRA2A,ADRA2C,ADRB1,ADRB2,AKT1,INS,INSR,NOS3,PDE3A,PIK3CG,PRKCE,PDE5A
	hsa04933	AGE-RAGE signaling pathway in diabetic complications	AKT1,MAPK14,IL1B,CXCL8,NOS3,SERPINE1,PRKCE,SELE,TNF
Digestive system disease	hsa04668	TNF signaling pathway	MAPK14,CXCL10,SELE,TNFRSF1A
	hsa04080	Neuroactive ligand-receptor interaction	ADRA2C,CHRM1,CHRM2,CHRM3,LTB4R
Immune system disease	hsa05143	African trypanosomiasis	IFNG,IL1B,IL10,PRKCA,PRKCB,PRKCG
	hsa05200	Pathways in cancer	FLT3,HSP90AA1,IFNG,IL2,PPARG,PRKCA,PRKCB,PRKCG,RARA
	hsa04060	Cytokine-cytokine receptor interaction	CD40LG,FLT3,IFNG,IL1B,IL2,IL10,CXCL10
	hsa04960	Aldosterone-regulated sodium reabsorption	INSR,PRKCA,PRKCB,PRKCG
	hsa04151	PI3K-Akt signaling pathway	FLT3,HSP90AA1,IL2,INSR,PRKCA
Inflammation	hsa04668	TNF signaling pathway	MAPK14,ICAM1,IKBKB,IL1B,IL6,JUN,MMP3,MMP9,NFKBIA,PTGS2,RELA,SELE,TNF,TNFRSF1A
	hsa05200	Pathways in cancer	AKR1B1,ESR1,ESR2,F2,FLT3,HSP90AA1,IKBKB,IL2,IL6,JUN,MET,MMP1,MMP9,NFE2L2,NFKBIA,NOS2,PPARG,PTGS2,RELA
	hsa04933	AGE-RAGE signaling pathway in diabetic complications	MAPK14,ICAM1,IL1B,IL6,JUN,PRKCE,RELA,SELE,TNF
	hsa05202	Transcriptional misregulation in cancer	FLT3,IL6,MET,MMP3,MMP9,MPO,PPARG,RELA
	hsa04071	Sphingolipid signaling pathway	MAPK14,ABCC1,PRKCE,RELA,TNF,TNFRSF1A
	hsa01522	Endocrine resistance	MAPK14,ESR1,ESR2,JUN,MMP9
	hsa04672	Intestinal immune network for IgA production	IL2,IL6,IL10,TNFSF13B
	hsa05205	Proteoglycans in cancer	MAPK14,ESR1,IL6,MET,MMP9,TNF
